# Supplementary material
Source: PubMed Central journal article supplement (PMC5928832)
Supplement: tpmd170806.SD1.pdf [file tpmd170806.SD1.pdf]

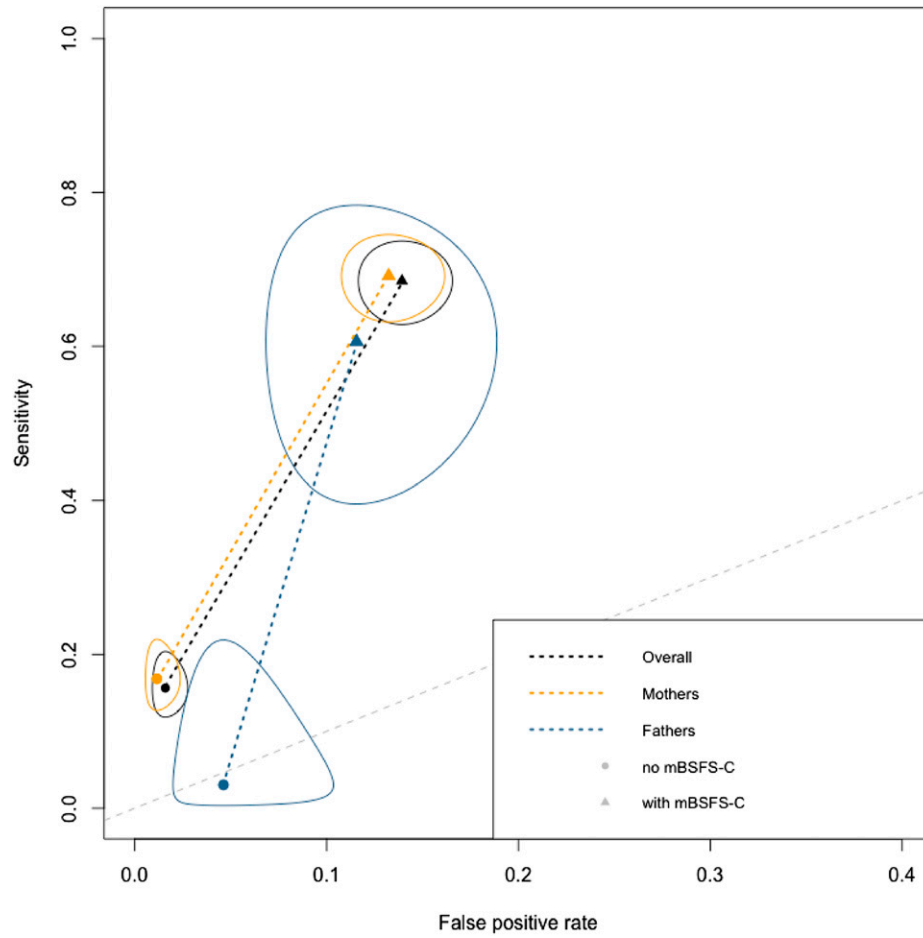

SUPPLEMENTAL FIGURE 1. ROC space plot for caregiver-reported stool consistency with and without the modified Bristol Stool Form Scale for children.

SUPPLEMENTAL TABLE 1

K-by-K matrix of caregiver-reported “loose or watery” stool versus laboratory technician–graded stool consistency using modified Bristol Stool Form Scale for children

| Caregiver-reported stool consistency<br>(index test 1) | First laboratory technician–graded stool consistency (reference standard) |               |               |               |                | Total (index test) |
|--------------------------------------------------------|---------------------------------------------------------------------------|---------------|---------------|---------------|----------------|--------------------|
|                                                        | Type 1: pellets                                                           | Type 2: lumpy | Type 3: snake | Type 4: loose | Type 5: watery |                    |
| Not loose or watery                                    | 290                                                                       | 479           | 404           | 332           | 35             | 1,540              |
| Loose or watery                                        | 0                                                                         | 11            | 8             | 35            | 33             | 87                 |
| Total (reference standard)                             | 290                                                                       | 490           | 412           | 367           | 68             | 1,628              |

SUPPLEMENTAL TABLE 2

K-by-K matrix of caregiver-reported stool consistency using modified Bristol Stool Form Scale for children (mBSFS-C) vs. laboratory technician–graded stool consistency using mBSFS-C

| Caregiver-reported stool consistency<br>using mBSFS-C (index test 2) | Laboratory technician–graded stool consistency (reference standard) |               |               |               |                | Total (index test) |
|----------------------------------------------------------------------|---------------------------------------------------------------------|---------------|---------------|---------------|----------------|--------------------|
|                                                                      | Type 1: pellets                                                     | Type 2: lumpy | Type 3: snake | Type 4: loose | Type 5: watery |                    |
| Type 1: pellets                                                      | <b>136</b>                                                          | 68            | 10            | 57            | 2              | 273                |
| Type 2: lumpy                                                        | 98                                                                  | <b>237</b>    | 99            | 36            | 5              | 475                |
| Type 3: snake                                                        | 35                                                                  | 76            | <b>267</b>    | 36            | 1              | 415                |
| Type 4: loose                                                        | 10                                                                  | 51            | 26            | <b>117</b>    | 16             | 220                |
| Type 5: watery                                                       | 11                                                                  | 58            | 10            | 121           | <b>44</b>      | 244                |
| Total (reference standard)                                           | 290                                                                 | 489           | 412           | 367           | 68             | 1,627              |

Bold indicates the total number of grades that agree in each category.
